# Supplementary material for: Efficient phosphate recovery as vivianite: synergistic effect of iron minerals and microorganisms
Source: Royal Society of Chemistry journal article supplement (doi:10.1039/d1ew00782c), 2021-12-10
Supplement: d1ew00782c1.pdf [file d1ew00782c1.pdf]

## Supplementary material

Table S1. Sequential extraction method of various P species.

| Step | Extractant                                                                            | Time | P fraction         | P species                                                                                                  |
|------|---------------------------------------------------------------------------------------|------|--------------------|------------------------------------------------------------------------------------------------------------|
| 1    | /                                                                                     | /    | H <sub>2</sub> O-P | aqueous P                                                                                                  |
| 2    | 0.1 M NaOH                                                                            | 18h  | NaOH-P             | P bound to Fe, e.g., P in Fe <sub>3</sub> (PO <sub>4</sub> ) <sub>2</sub> ·8H <sub>2</sub> O in this study |
| 3    | 0.11 M NaHCO <sub>3</sub> + 0.11 M Na <sub>2</sub> S <sub>2</sub> O <sub>4</sub> (BD) | 0.5h | BD-P               | P adsorbed to Fe oxides                                                                                    |

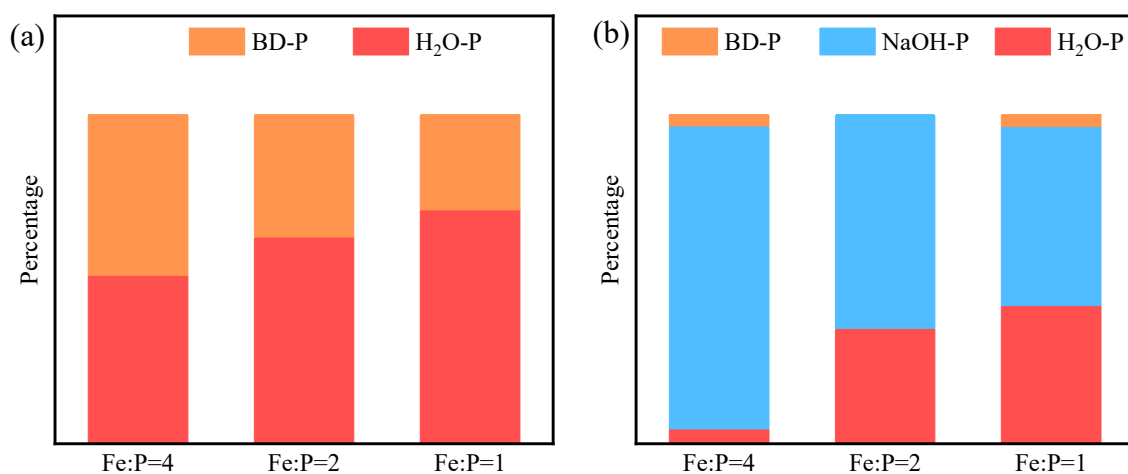

Fig.S1 Analysis of phosphate species in the sterile control group (a) and in Fe/P ratio of 4, 2 and 1 batches (b) of ferrihydrite.

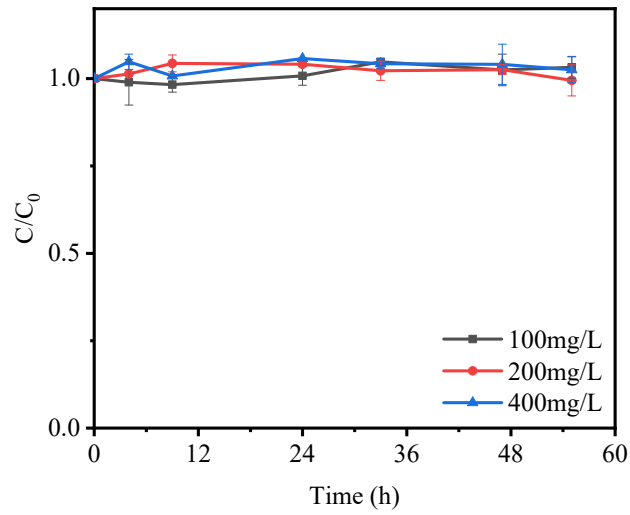

Fig.S2 The concentration of  $\text{PO}_4^{3-}$  with incubation time in control group without ferrihydrite. The initial concentration of  $\text{PO}_4^{3-}$  were 100 mg/L, 200 mg/L, 300 mg/L.

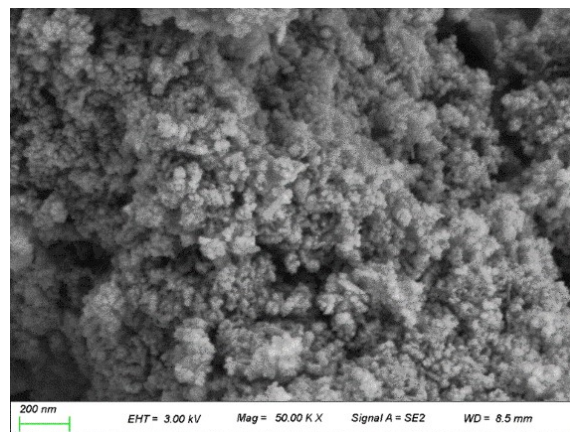

Fig.S3 SEM of biom mineralization product of magnetite without phosphate.

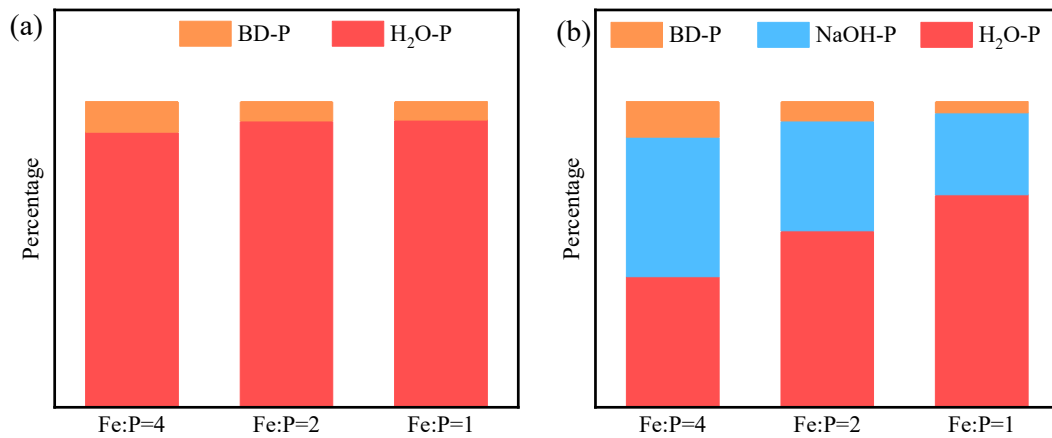

Fig.S4 Analysis of phosphate species in the sterile control group (a) and in Fe/P ratio of 4, 2 and 1 batches (b) of magnetite.

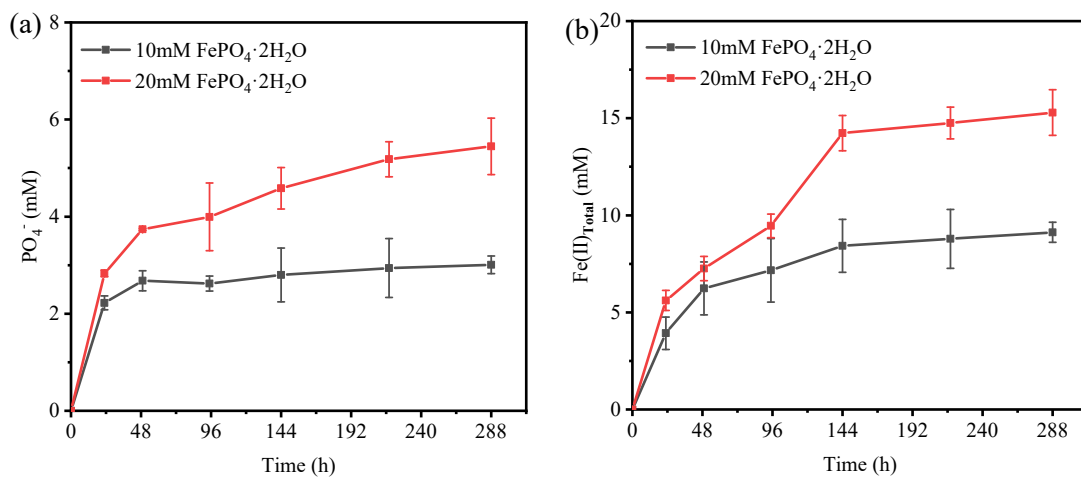

Fig.S5 The concentration of (a)PO<sub>4</sub><sup>3-</sup> and (b) Fe(II)<sub>Total</sub> with incubation time in FePO<sub>4</sub>·2H<sub>2</sub>O batches.

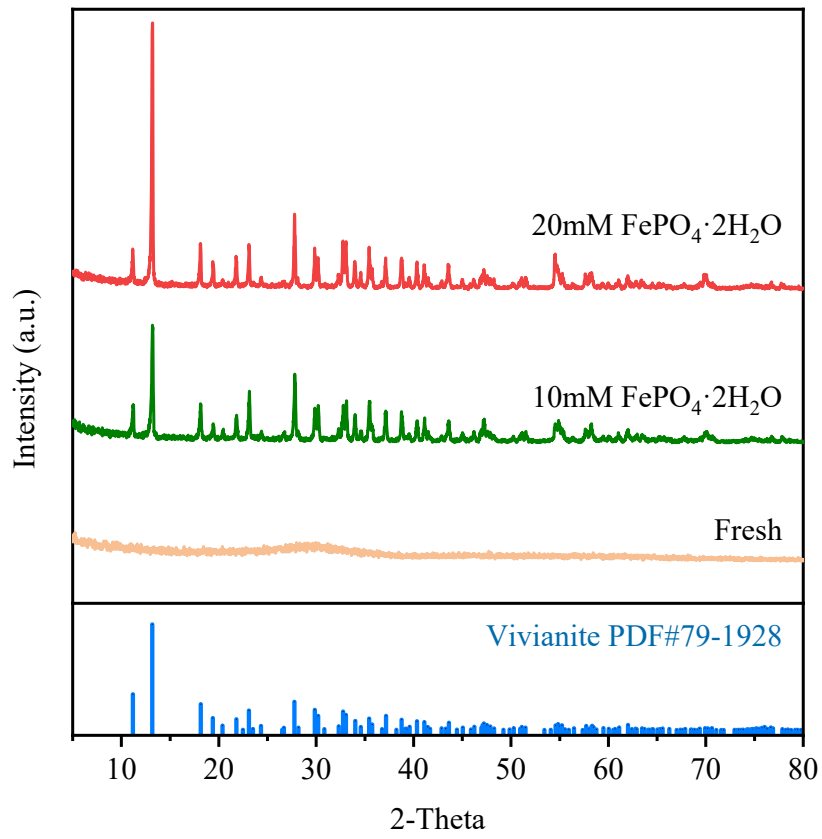

Fig.S6 XRD images of biom mineralization products of FePO<sub>4</sub>·2H<sub>2</sub>O.
